# Supplementary material
Source: publisher figshare collection journal article supplement (https://brill.figshare.com/articles/dataset/_/5743545)
Supplement: Supplementary file 1 [file 1]

# A common toad hybrid zone that runs from the Atlantic to the Mediterranean

Jan W. Arntzen<sup>1</sup>, Jacob McAtear<sup>1</sup>, Roland Butôt<sup>1</sup>, Iñigo Martínez-Solano<sup>1, 2, 3</sup>

1 - Naturalis Biodiversity Center, P.O. Box 9517, 2300 RA Leiden, The Netherlands

2 - Evolution and Development Group, Department of Wetland Ecology, Doñana Biological Station, CSIC, c/ Americo Vespucio s/n, 41092 Seville, Spain

3 - Present address: Department of Biodiversity and Evolutionary Biology, Museo Nacional de Ciencias Naturales, CSIC, c/ José Gutiérrez Abascal 2, 28006 Madrid, Spain

## **Supplementary Figures**

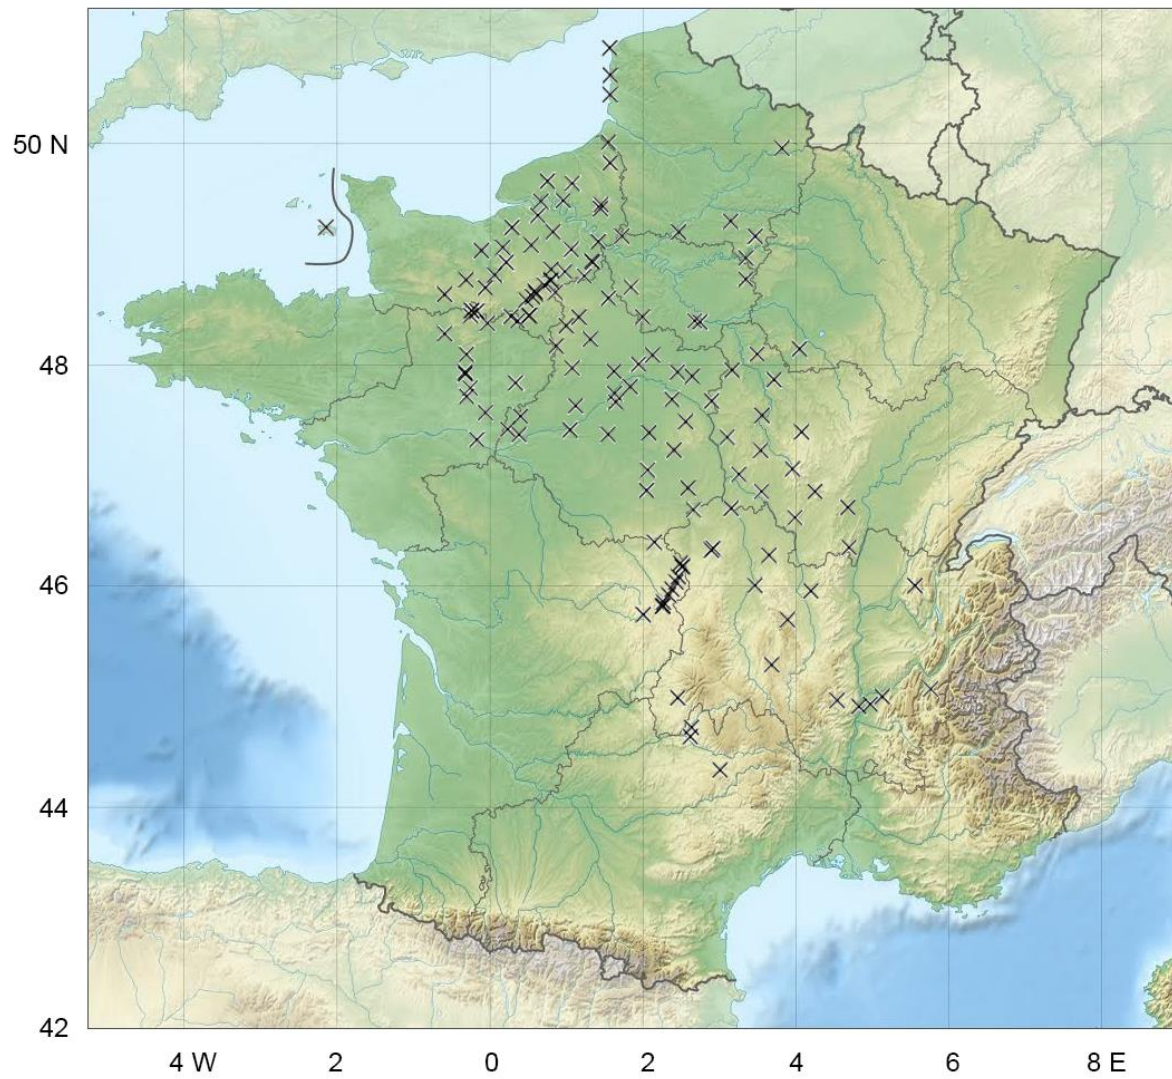

**Supplementary Figure S1.** Common toad populations (cross symbols) studied for species affiliation by RFLP analysis of mitochondrial DNA.

Frequency of allele typical for *Bufo spinosus*

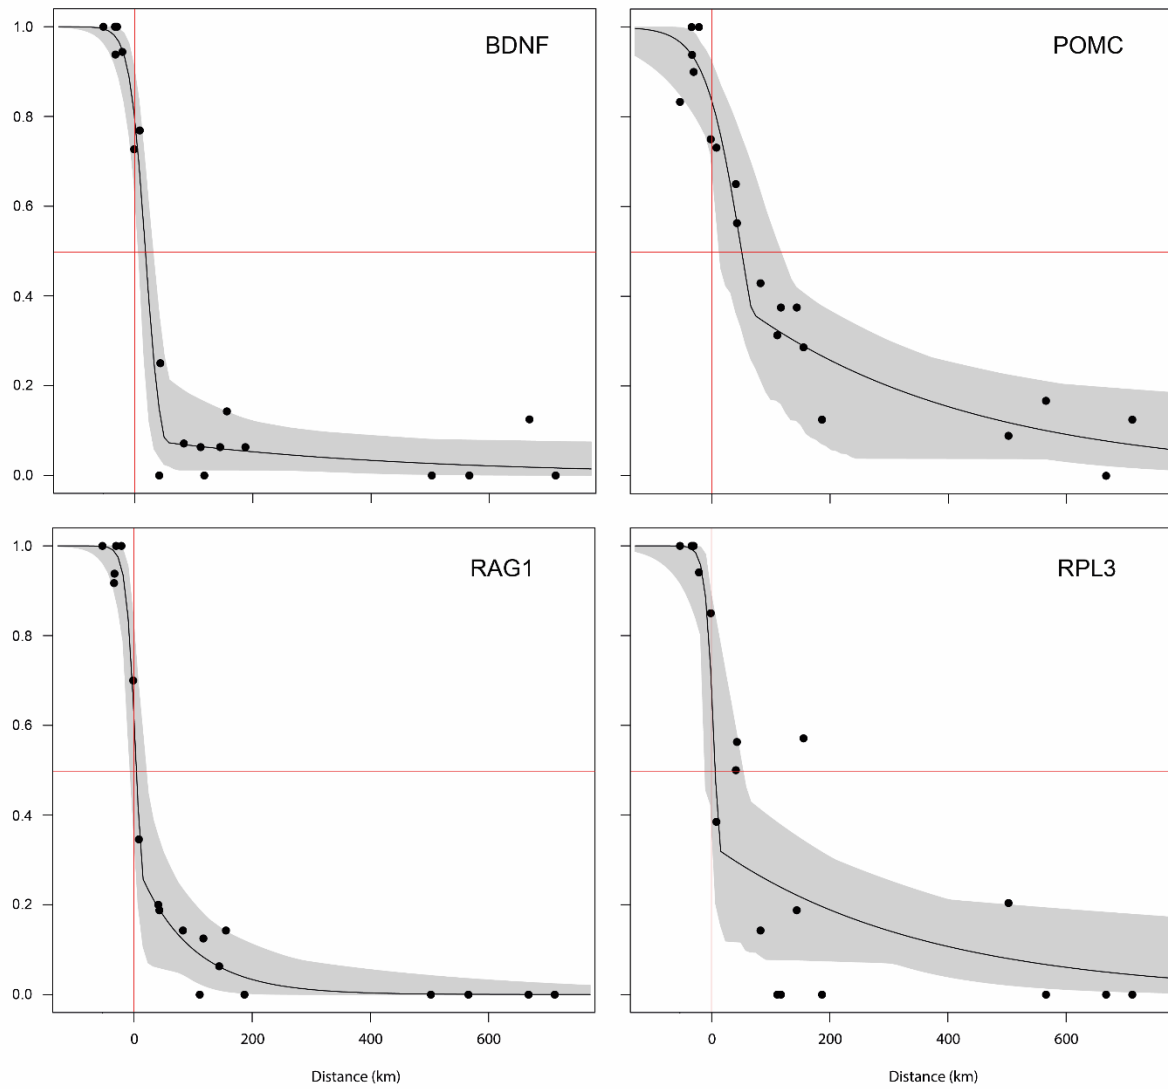

**Supplementary Figure S2.** Geographical cline analysis for common toads in a transect from central France northwards. *Bufo spinosus* is to the left, with  $F_s$ -values close to unity and *B. bufo* is to the right, with  $F_s$ -values approaching zero. Solid dots are population averages and the two log-likelihood unit support limits are in grey. The red cross wire indicates the centre of the mitochondrial cline at  $x=0=B156$  and  $y=0.5=F_s$ . Populations to the left are from B137 to B118 as shown in fig. 1. The four populations to the right are located in Belgium and the Netherlands.
